# Supplementary material for: Measuring General Health Literacy in Chinese adults: validation of the HLS19-Q12 instrument
Source: Springer Nature journal article supplement (doi:10.1186/s12889-024-17977-1), 2024-04-15
Supplement: MOESM1 [file 26980806]

**Appendix 1.** Minor changes to the HLS<sub>19</sub>-Q12 when comparing English and Chinese versions

| Item number | HLS <sub>19</sub> -Q12                                                                                                                  |                                                                                                                                                                    | Notes                                                                                                       |
|-------------|-----------------------------------------------------------------------------------------------------------------------------------------|--------------------------------------------------------------------------------------------------------------------------------------------------------------------|-------------------------------------------------------------------------------------------------------------|
|             | English version                                                                                                                         | Chinese version                                                                                                                                                    |                                                                                                             |
| 1           | ...to find out where to get professional help when you are ill? (e.g., doctor, nurse, pharmacist, psychologist)                         | ...to find out where to get professional help when you are ill? (e.g., doctor, pharmacist, psychologist, online medical consultation)                              | We removed the example of “nurse” and added an example of “online medical consultation.”                    |
| 2           | ...to understand information about what to do in a medical emergency?                                                                   | ...to understand information about what to do in a medical emergency (e.g., fainting, coma, trauma)?                                                               | We added three examples of medical emergencies (e.g., fainting, coma, trauma).                              |
| 3           | ...to judge the advantages and disadvantages of different treatment options?                                                            | ...to judge the advantages and disadvantages of different treatment options (e.g., surgery, Western medicine, Chinese medicine)?                                   | We added three examples of different treatment options (e.g., surgery, Western medicine, Chinese medicine). |
| 4           | ...to act on advice from your doctor or pharmacist?                                                                                     | ...to act on advice (e.g., less fried food, more exercise) from your doctor or pharmacist?                                                                         | We added two examples of advice from doctors or pharmacists (e.g., less fried food, more exercise).         |
| 5           | ...to find information on how to handle mental health problems? (e.g., stress, depression or anxiety)                                   | ...to find information on how to handle mental health problems? (e.g., stress, depression or anxiety)                                                              | No change                                                                                                   |
| 6           | ...to understand information about recommended health screenings or examinations? (e.g., colorectal cancer screening, blood sugar test) | ...to understand information about recommended health screenings or examinations? (e.g., colorectal cancer screening, blood sugar test, blood pressure test)       | We added an example of “blood pressure test”.                                                               |
| 7           | ...to judge if information on unhealthy habits, such as smoking, low physical activity or drinking too much alcohol, are reliable?      | ...to judge if information on unhealthy habits, such as smoking, low physical activity or drinking too much alcohol, are reliable? (e.g., smoking leads to cancer) | We added an example of “smoking leads to cancer”.                                                           |

| Item number | HLS <sub>19</sub> -Q12                                                                                                           |                                                                                                                                                 | Notes                                                                                                           |
|-------------|----------------------------------------------------------------------------------------------------------------------------------|-------------------------------------------------------------------------------------------------------------------------------------------------|-----------------------------------------------------------------------------------------------------------------|
|             | English version                                                                                                                  | Chinese version                                                                                                                                 |                                                                                                                 |
| 8           | ...to decide how you can protect yourself from illness using information from the mass media? (e.g., Newspapers, TV or Internet) | ...to decide how you can protect yourself from illness using information from the mass media? (e.g., Newspapers, TV or Internet)                | No change                                                                                                       |
| 9           | ...to find information on healthy life styles such as physical exercise, healthy food or nutrition?                              | ...to find information on healthy life styles such as physical exercise, healthy food or nutrition?                                             | No change                                                                                                       |
| 10          | ...to understand advice concerning your health from family or friends?                                                           | ...to understand advice concerning your health from family or friends (e.g., healthy food, more exercise)?                                      | We added two examples of advice from family or friends (e.g., healthy food, more exercise).                     |
| 11          | ...to judge how your housing conditions may affect your health and well-being?                                                   | ...to judge how your housing conditions (e.g., light, ventilation, formaldehyde and other harmful gases) may affect your health and well-being? | We added three examples of housing conditions (e.g., light, ventilation, formaldehyde and other harmful gases). |
| 12          | ...to make decisions to improve your health and well-being?                                                                      | ...to make decisions to improve your health and well-being?                                                                                     | No change                                                                                                       |

**Appendix 2.** Distribution of missing data in the analytic sample (N=14184)

| Variable                                       | Missing n (%) |
|------------------------------------------------|---------------|
| Sex                                            | 0             |
| Age                                            | 1340 (9.4)    |
| Ethnicity                                      | 0             |
| Single parent                                  | 0             |
| Highest educational level                      | 0             |
| Household income                               | 3542 (25.0)   |
| Health Literacy Survey- Item 1                 | 98 (0.7)      |
| Health Literacy Survey- Item 2                 | 557 (3.9)     |
| Health Literacy Survey- Item 3                 | 1256 (8.9)    |
| Health Literacy Survey- Item 4                 | 36 (0.3)      |
| Health Literacy Survey- Item 5                 | 644 (4.5)     |
| Health Literacy Survey- Item 6                 | 544 (3.8)     |
| Health Literacy Survey- Item 7                 | 90 (0.6)      |
| Health Literacy Survey- Item 8                 | 126 (0.9)     |
| Health Literacy Survey- Item 9                 | 30 (0.2)      |
| Health Literacy Survey- Item 10                | 33 (0.2)      |
| Health Literacy Survey- Item 11                | 139 (1.0)     |
| Health Literacy Survey- Item 12                | 40 (0.3)      |
| Health Literacy Survey- Total scores           | 0             |
| General health status                          | 0             |
| Total scores of health-compromising behaviours | 0             |
| Total scores of health service use             | 0             |

### Appendix 3. Results using multiply imputed data (N=14184)

| Predictor                    | Health literacy                 |                   | Global health status            |                   | Health compromising behaviours  |                   | Health service use              |                   |
|------------------------------|---------------------------------|-------------------|---------------------------------|-------------------|---------------------------------|-------------------|---------------------------------|-------------------|
|                              | Unstandardised $\beta$ (95% CI) | Standardised Beta | Unstandardised $\beta$ (95% CI) | Standardised Beta | Unstandardised $\beta$ (95% CI) | Standardised Beta | Unstandardised $\beta$ (95% CI) | Standardised Beta |
| Health literacy (continuous) | -                               | -                 | -0.008<br>(-0.008, -0.007)      | -0.21             | -0.008<br>(-0.009, -0.007)      | -0.13             | -0.010<br>(-0.012, -0.009)      | -0.14             |
| Sex                          | 0.74<br>(-0.14, 1.63)           | 0.01              | -0.105<br>(-0.137, -0.074)      | -0.05             | 1.134<br>(1.085, 1.184)         | 0.37              | -0.132<br>(-0.198, -0.066)      | -0.03             |
| Age                          | -0.08<br>(-0.15, -0.01)         | -0.02             | 0.006<br>(0.003, 0.008)         | 0.04              | -0.032<br>(-0.036, -0.028)      | -0.13             | 0.005<br>(-0.001, 0.01)         | 0.02              |
| Ethnicity                    | 1.84<br>(-0.64, 4.32)           | 0.01              | 0.146<br>(0.058, 0.234)         | 0.03              | 0.029<br>(-0.108, 0.167)        | 0.003             | 0.298<br>(0.114, 0.482)         | 0.03              |
| Highest educational level    | 1.39<br>(1.02, 1.76)            | 0.07              | 0.070<br>(0.057, 0.084)         | 0.10              | 0.078<br>(0.057, 0.099)         | 0.06              | 0.041<br>(0.013, 0.068)         | 0.03              |
| Household income             | 1.47<br>(1.19, 1.75)            | 0.10              | -0.008<br>(-0.018, 0.002)       | -0.02             | 0.024<br>(0.009, 0.04)          | 0.03              | 0.006<br>(-0.015, 0.026)        | 0.01              |
| Constant                     | 74.98<br>(70.88, 79.08)         | -                 | 2.196<br>(2.043, 2.348)         | -                 | 5.153<br>(4.915, 5.392)         | -                 | 2.103<br>(1.785, 2.422)         | -                 |
| Model fit (R <sup>2</sup> )  | 0.02                            |                   | 0.05                            |                   | 0.16                            |                   | 0.02                            |                   |

Sex: Gender is male (versus female as a reference group). Age is continuous in years. Ethnicity is ethnic minorities (versus Han as a reference group). Highest educational level has five categories, including Year 6 or below, Year 7-9, Year 10-12, Diploma, and Bachelor's degree or above. Household income has six categories, including 20,000 CNY or below, 20,000 to 39,000 CNY, 40,000 to 59,000 CNY, 60,000 to 79,000 CNY, 80,000 to 149,000 CNY, and 150,000 CNY or above. CI, confidence interval.

**Appendix 4.** Missing data on health literacy

eTable 4.1. Summary of participants' characteristics by missing group

| Participants' characteristics | Missing data on health literacy |              | P value |
|-------------------------------|---------------------------------|--------------|---------|
|                               | No (n=14184)                    | Yes (n=2003) |         |
| Location                      |                                 |              |         |
| Urban                         | 4013 (28.3)                     | 355 (17.7)   | P<0.001 |
| Rural                         | 10171 (71.7)                    | 1648 (82.3)  |         |
| Sex                           |                                 |              |         |
| Female                        | 9863 (69.5)                     | 1452 (72.5)  | 0.007   |
| Male                          | 4321 (30.5)                     | 551 (27.5)   |         |
| Age group                     |                                 |              |         |
| 35 years or below             | 4647 (36.2)                     | 631 (33.9)   | P=0.001 |
| 36-40 years                   | 4661 (36.3)                     | 644 (34.5)   |         |
| 41 years or above             | 3536 (27.5)                     | 589 (31.6)   |         |
| Ethnicity                     |                                 |              |         |
| Han                           | 13816 (97.4)                    | 1936 (96.7)  | 0.052   |
| Ethnic minorities             | 368 (2.6)                       | 67 (3.3)     |         |
| Single parent                 |                                 |              |         |
| No                            | 13487 (95.1)                    | 1892 (94.5)  | 0.227   |
| Yes                           | 697 (4.9)                       | 111 (5.5)    |         |
| Highest educational level     |                                 |              |         |
| Year 6 or below               | 556 (3.9)                       | 214 (10.7)   | P<0.001 |
| Year 7-9                      | 5138 (36.2)                     | 1153 (57.6)  |         |
| Year 10-12                    | 3581 (25.2)                     | 390 (19.5)   |         |
| Diploma                       | 2893 (20.4)                     | 181 (9.0)    |         |
| Bachelor's degree or above    | 2016 (14.2)                     | 65 (3.2)     |         |
| Household income              |                                 |              |         |
| 20,000 CNY or below           | 2833 (26.6)                     | 694 (48.5)   | P<0.001 |
| 20,000 to 39,000 CNY          | 2088 (19.6)                     | 299 (20.9)   |         |
| 40,000 to 59,000 CNY          | 1867 (17.5)                     | 198 (13.8)   |         |
| 60,000 to 79,000 CNY          | 1356 (12.7)                     | 106 (7.4)    |         |
| 80,000 to 149,000 CNY         | 1590 (14.9)                     | 97 (6.8)     |         |
| 150,000 CNY or above          | 908 (8.5)                       | 37 (2.6)     |         |

eTable 4.2. Distribution of missing data on each item among those who had missing data on the HLS19-Q12 (n=2003)

|             | n (%)       |
|-------------|-------------|
| Item 1      |             |
| Non-missing | 1459 (72.8) |
| Missing     | 544 (27.2)  |
| Item 2      |             |
| Non-missing | 862 (43.0)  |
| Missing     | 1141 (57.0) |
| Item 3      |             |
| Non-missing | 471 (23.5)  |
| Missing     | 1532 (76.5) |
| Item 4      |             |
| Non-missing | 1625 (81.1) |
| Missing     | 378 (18.9)  |
| Item 5      |             |
| Non-missing | 615 (30.7)  |
| Missing     | 1388 (69.3) |
| Item 6      |             |
| Non-missing | 569 (28.4)  |
| Missing     | 1434 (71.6) |
| Item 7      |             |
| Non-missing | 1115 (55.7) |
| Missing     | 888 (44.3)  |
| Item 8      |             |
| Non-missing | 1012 (50.5) |
| Missing     | 991 (49.5)  |
| Item 9      |             |
| Non-missing | 1292 (64.5) |
| Missing     | 711 (35.5)  |
| Item 10     |             |
| Non-missing | 1307 (65.3) |
| Missing     | 696 (34.7)  |
| Item 11     |             |
| Non-missing | 931 (46.5)  |
| Missing     | 1072 (53.5) |
| Item 12     |             |
| Non-missing | 1355 (67.6) |
| Missing     | 648 (32.4)  |

**Appendix 5.** Correlations between the 12-item Health Literacy Survey (HLS<sub>19</sub>-Q12) and nine scales of the Health Literacy Questionnaire (HLQ-44)

| Health Literacy Questionnaire (HLQ-44) | Health Literacy Survey (HLS <sub>19</sub> -Q12) |
|----------------------------------------|-------------------------------------------------|
| Scale 1                                | 0.24*                                           |
| Scale 2                                | 0.29*                                           |
| Scale 3                                | 0.25*                                           |
| Scale 4                                | 0.26*                                           |
| Scale 5                                | 0.27*                                           |
| Scale 6                                | 0.41*                                           |
| Scale 7                                | 0.42*                                           |
| Scale 8                                | 0.42*                                           |
| Scale 9                                | 0.39*                                           |

\* p values < 0.001
